# Supplementary material for: Risk Evaluation of Pollutants Emission from Coal and Coal Waste Combustion Plants and Environmental Impact of Fly Ash Landfilling
Source: MDPI journal article supplement (doi:10.3390/toxics11040396), 2023-04-21
Supplement: s1 [file s1]

# Risk Evaluation of Pollutants Emission from Coal and Coal Waste Combustion Plants and Environmental Impact of Fly Ash Landfilling

Jovana Z. Buha Marković <sup>1,\*</sup>, Ana D. Marinković <sup>1</sup>, Jasmina Z. Savić <sup>1</sup>, Milica R. Mladenović <sup>1</sup>, Milić D. Erić <sup>1</sup>, Zoran J. Marković <sup>1</sup> and Mirjana Đ. Ristić <sup>2</sup>

<sup>1</sup> Vinča Institute of Nuclear Sciences—National Institute of the Republic of Serbia, University of Belgrade, Mike Petrovića Alasa 12–14, 11351 Belgrade, Serbia

<sup>2</sup> Faculty of Technology and Metallurgy, University of Belgrade, Karnegijeva 4, 11120 Belgrade, Serbia  
Supplementary material

## S. MATERIALS AND METHODS

### S1. Ash sample collection and storage

Fly ash sampling locations at four combustion facilities, as well as the locations of lignite mining basins are shown in Table S1.

**Table S1.** Locations of combustion facilities and lignite mining basins.

| Combustion Facility  | Location                     | Installed Capacity (MW) | Lignite Source    |
|----------------------|------------------------------|-------------------------|-------------------|
| TPP Kolubara A       | 44° 28' 51" N, 20° 17' 36" E | 32                      | KB                |
| TPP Kostolac B       | 44° 43' 41" N, 21° 12' 50" E | 350                     | DB                |
| TPP Nikola Tesla A   | 44° 40' 20" N, 20° 9' 22" E  | 210                     | KB                |
| Fluidized bed boiler | 44° 45' 20" N, 20° 36' 10" E | 0.5                     | KB (TPP Kolubara) |
| Lignite mining basin | Location                     |                         |                   |
| Kolubara basin (KB)  | 44° 30' 38" N, 20° 7' 32" E  |                         |                   |
| Drmno basin (DB)     | 44° 42' 27" N, 21° 14' 51" E |                         |                   |

### S2. Sequential extraction procedure

The following fractions of trace elements were extracted in a sequential extraction procedure:

- **Water soluble fraction—F1:** 5 g of ash sample was taken in polyethylene bottles and shaken with 50 mL of pure Millipore water for 3 h at room temperature. After that they were filtered using Whatman filter paper 42 and the filtrate was kept for further analysis.
- **Exchangeable fraction—F2:** the residue from the previous step was treated with 8 mL of 1 M MgCl<sub>2</sub>, shaken for 1 h at room temperature and filtered on Whatman filter paper 42. The filtrate was kept for further analysis.
- **Carbonate bound fraction—F3:** the residue from the previous step was mixed on an orbital shaker with 50 mL of 1 M sodium acetate at pH 5 for 1 h at room temperature and filtered on Whatman filter paper 42. The filtrate was kept for further analysis.
- **Metal oxide bound fraction—F4:** the residue obtained from the previous step was treated with 50 mL of 0.04 M hydroxylamine hydrochloride in 25% acetic acid and digested for 5 h on a hot plate at 96°C. After digestion, the

solution was filtered on Whatman filter paper 42. The filtrate was kept for further analysis.

- **Organic bound fraction—F5:** the residue from the previous step was treated with 10 mL of 30%  $\text{H}_2\text{O}_2$  and 10 mL 0.02 M  $\text{HNO}_3$  and after that was heated at  $85^\circ\text{C}$  for 3 h, covered with a watch glass and digested for 1 h. After the solution got vaporized the residue was cooled. 20 mL of 3.2 M  $\text{CH}_3\text{COONH}_4$  in 20%  $\text{HNO}_3$  was added and shaken continuously for 30 min. The solution was filtered on Whatman filter paper 42. The filtrate was kept for further analysis.
- **Residual fraction—F6:** 0.2 g of residue was subjected to microwave digestion with 8 mL of aqua regia, up to  $220^\circ\text{C}$  with a heating rate of  $5^\circ\text{C}/\text{min}$ , and then held for 15 min at  $220^\circ\text{C}$ . The filtrate was diluted by distilled water to 50 mL and analyzed.

### S3. ICP-MS Analysis

The instrument optimization was done with a tuning solution containing 1  $\mu\text{g}/\text{L}$  Li, Mg, Co, Y, Ce and Tl (Agilent). The limits of detection of measured elements were ( $\mu\text{g}/\text{L}$ ): As 0.015, Be 0.046, Cd 0.002, Co 0.001, Cr 0.015, Cs 0.01, Cu 0.005, Ga 0.007, Ge 0.006, Hg 0.01, Mn 0.098, Mo 0.07, Ni 0.022, Pb 0.005, Sb 0.01, Sr 0.163, U 0.005, V 0.001. Quality control was performed using the certified reference material SLRS-5. Accuracy was in the range of 88–112%.

### Figures:

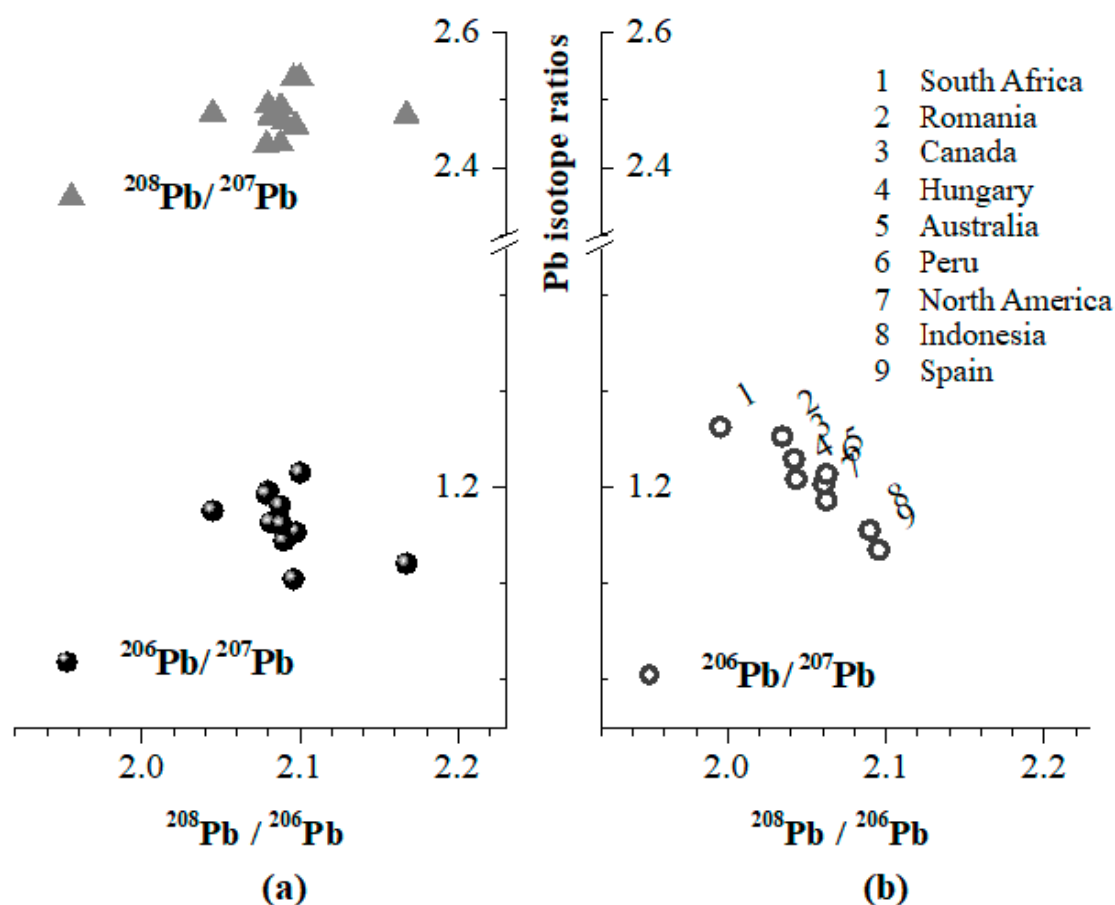

**Figure S1.** (a) Lead isotope ratios ( $^{206}\text{Pb}/^{207}\text{Pb}$  and  $^{208}\text{Pb}/^{207}\text{Pb}$  vs.  $^{208}\text{Pb}/^{206}\text{Pb}$ ) for all investigated samples from Serbia (8 fly ashes and 4 coals); (b) Lead isotope ratios ( $^{206}\text{Pb}/^{207}\text{Pb}$  vs.  $^{208}\text{Pb}/^{206}\text{Pb}$ ) depending on the originating country.

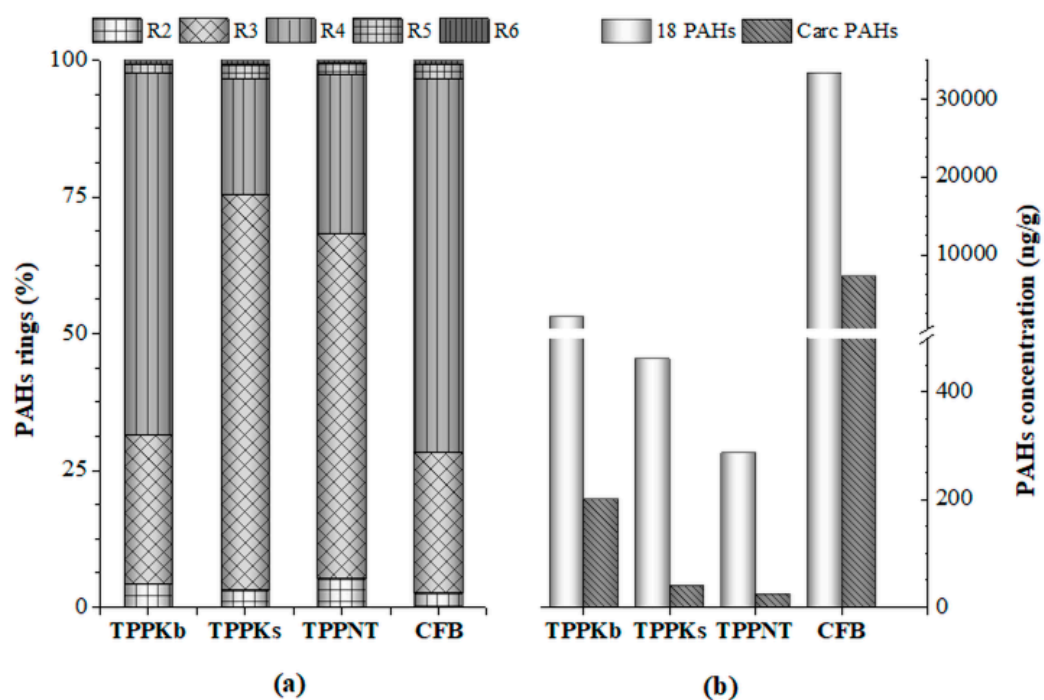

**Figure S2.** (a) PAHs proportions by their ring number (R2-R6); (b) The total and carcinogenic PAHs content for fly ashes (TPPKb, TPPKs, TPPNT and CFB).

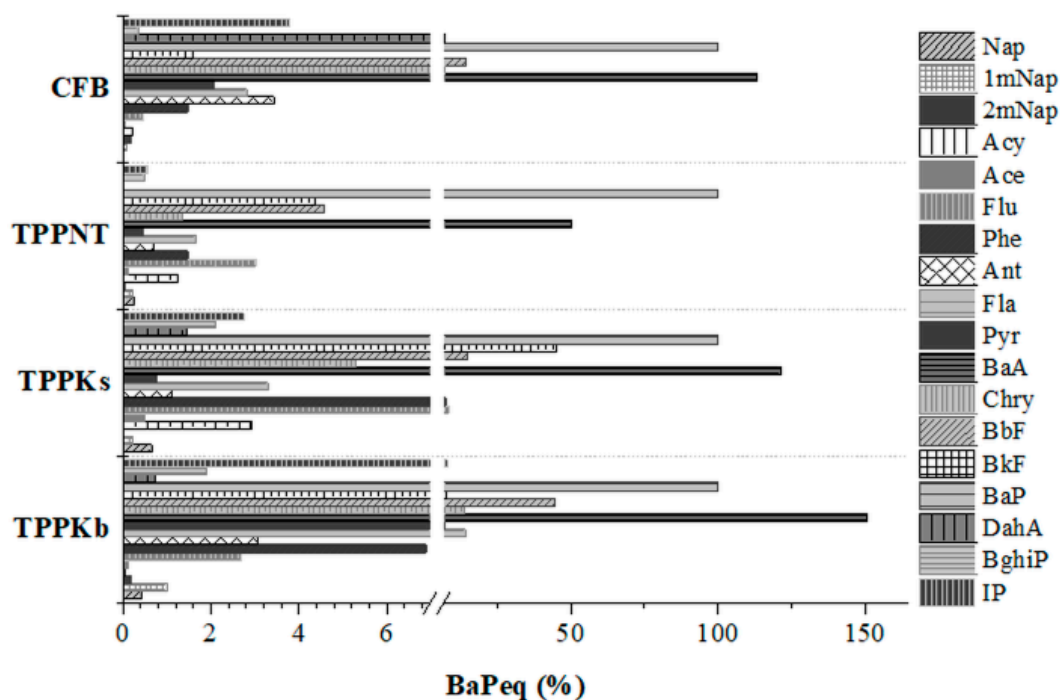

**Figure S3.** The individual BaP<sub>eq</sub> ratios relative to BaP (%).

**Tables:****Table S2.** Limit values of NO<sub>x</sub>, CO, SO<sub>2</sub> and total PM concentrations (mg/Nm<sup>3</sup>) in flue gases of combustion facilities with different capacities.

| Combustion Facility | Pollutant       |      |                 |          | Source |
|---------------------|-----------------|------|-----------------|----------|--------|
|                     | NO <sub>x</sub> | CO   | SO <sub>2</sub> | total PM |        |
| TPP Nikola Tesla A  | 500             | 250  | 400             | 50       | [2]    |
| TPP Kostolac B      | 500             | 250  | 400             | 50       | [2]    |
| TPP Kolubara A      | 600             | 250  | 1880            | 1010     | [2]    |
| FBB*                | /               | 2000 | /               | 150      | [2]    |

\* Limit values for low capacity combustion facilities are expressed for 8% O<sub>2</sub>

**Table S3.** Flue gas emissions of trace elements (µg/m<sup>3</sup>).

| Combustion Facility | As    | Cr   | Hg    | Pb    | Source     |
|---------------------|-------|------|-------|-------|------------|
| TPP Nikola Tesla A  | 11.23 | 7.26 | 10.23 | 27.30 | This paper |
| TPP Kostolac B      | 19.44 | 8.83 | 10.17 | 42.68 | This paper |
| TPP Kolubara A      | 9.20  | 4.57 | 6.17  | 15.66 | This paper |
| FBB                 | 5.80  | 7.37 | 4.02  | 26.27 | This paper |
| Emission standard   | 2.00  | 2.54 | 5.08  | 3.81  | [3]        |
|                     | 2.54  | 900  | 30    | 80    | [4]        |

**Table S4.** Adjusted indices of element enrichment degree, environmental risk and ecological risk.

| Class | CEF   | Enrichment degree [5] | Class | RAC (%) | Environmental Risk [6]   | Class | RI      | Ecological Risk [7] |
|-------|-------|-----------------------|-------|---------|--------------------------|-------|---------|---------------------|
| 1     | < 2   | no enrichment         | 1     | < 1     | safe for the environment | 1     | < 150   | low                 |
| 2     | 2-5   | moderate              | 2     | 1-10    | low risk                 | 2     | 150-300 | moderate            |
| 3     | 5-20  | significant           | 3     | 11-30   | medium risk              | 3     | 300-600 | considerable        |
| 4     | 20-40 | high                  | 4     | 31-50   | high risk                | 4     | > 600   | very high           |
| 5     | > 40  | very high             | 5     | > 50    | very high risk           |       |         |                     |

**Table S5.** Comparative view of total heavy metal concentrations and their water leachates with literature data

| Samples                   | Total Concentration (mg/kg) |      |     |     |      |     |    | Water Leachates (mg/kg) |       |                     |      |      |      |      |
|---------------------------|-----------------------------|------|-----|-----|------|-----|----|-------------------------|-------|---------------------|------|------|------|------|
|                           | As                          | Cd   | Cr  | Cu  | Hg   | Ni  | Pb | As                      | Cd    | Cr                  | Cu   | Hg   | Ni   | Pb   |
| TPPKb                     | 63.0                        | 0.44 | 158 | 62  | 1.77 | 107 | 23 | 2.83                    | 0.004 | 1.5                 | 0.70 | n.d. | n.d. | n.d. |
| TPPKs                     | 52.8                        | 0.76 | 121 | 122 | 1.10 | 99  | 25 | 0.61                    | n.d.  | 1.2                 | 0.10 | n.d. | n.d. | n.d. |
| TPPNT                     | 56.3                        | 0.26 | 183 | 70  | 2.00 | 91  | 29 | 0.36                    | n.d.  | 1.7                 | 0.13 | n.d. | n.d. | n.d. |
| CFB                       | 16.9                        | n.d. | 108 | 98  | 0.50 | 70  | 16 | 0.38                    | n.d.  | 1.4                 | n.d. | n.d. | n.d. | n.d. |
| Limit values* (mg/kg)     | 30                          | 17.5 | 300 | 700 | 1    | 150 | 15 |                         |       | n.d. – not detected |      |      |      |      |
| Water leachates** (mg/kg) |                             |      |     |     |      |     | NH | 2                       | 1     | 10                  | 50   | 10   | 10   |      |
|                           |                             |      |     |     |      |     | H  | 25                      | 5     | 70                  | 100  | 40   | 50   |      |

\* heavy metal maximal permissible concentrations in ashes used in agriculture and as a forest fertilizer—Finland legislation [8]

\*\* limit values for water leachates of ashes (NH-non-hazardous, H-hazardous)—European legislation [9]

**Table S6.** Pollution indices (PIs) of investigated trace elements for all FAs.

| element | PI         |                 |       |            |                 |
|---------|------------|-----------------|-------|------------|-----------------|
|         | TPPKb      | TPPKs           | TPPNT | CFB        |                 |
| As      | 42.17      | 35.19           | 37.51 | 11.25      |                 |
| Be      | 0.70       | 0.42            | 0.79  | 0.42       |                 |
| Cd      | 4.53       | 7.77            | 2.69  | n.d.       |                 |
| Co      | 1.40       | 1.00            | 1.92  | 0.61       |                 |
| Cr      | 4.51       | 3.45            | 5.23  | 3.09       |                 |
| Cs      | 1.10       | 0.57            | 1.10  | 0.37       |                 |
| Cu      | 2.37       | 4.86            | 2.75  | 3.90       |                 |
| Ga      | 0.30       | 0.36            | 0.52  | 0.38       |                 |
| Ge      | 0.71       | 1.02            | 0.92  | 0.79       |                 |
| Hg      | 24.30      | 15.81           | 29.35 | 6.71       |                 |
| Mn      | 1.01       | 0.41            | 0.76  | 0.35       |                 |
| Mo      | 2.36       | 1.93            | 1.98  | 1.41       |                 |
| Ni      | 5.36       | 4.94            | 4.54  | 3.50       |                 |
| Pb      | 1.16       | 1.25            | 1.47  | 0.82       |                 |
| Sb      | 5.12       | 4.80            | 5.45  | 10.33      |                 |
| Sr      | 0.43       | 0.20            | 0.33  | 0.19       |                 |
| U       | 1.57       | 1.11            | 1.91  | 0.98       |                 |
| V       | 2.53       | 3.76            | 2.89  | 1.68       |                 |
| class   | ranges     | pollution level | class | ranges     | pollution level |
| 1       | PI < 1     | none            | 4     | 3 ≤ PI < 5 | high            |
| 2       | 1 ≤ PI < 2 | low             | 5     | PI ≥ 5     | very high       |
| 3       | 2 ≤ PI < 3 | moderate        |       |            |                 |

## References

1. Buha-Marković, J.Z.; Marinković, A.D.; Nemoda, S.Đ.; Savić, J.Z. Distribution of PAHs in coal ashes from the thermal power plant and fluidized bed combustion system; estimation of environmental risk of ash disposal. *Environmental Pollution* **2020**, *266*, 115282. <https://doi.org/10.1016/j.envpol.2020.115282>.
2. Government of the Republic of Serbia. Regulation on Emission Limit Values for Gaseous Pollutants from the Combustion Plants; 110-13947/2015-1; Government of the Republic of Serbia: Belgrade, The Republic of Serbia, **2016**.
3. U.S. EPA, *National emission standards for hazardous air pollutants: coal- and oil-fired electric utility steam generating units; Subcategory of certain existing electric utility steam generating units firing eastern bituminous coal refuse for emissions of acid gas hazardous air pollutants*; US EPA: Durham, N.C., **2020**.
4. Ministry of Environmental Protection of China (MEPC). Emission standard of air pollutants for coal-fired power plants. Ministry of Environmental Protection of China (MEPC): Beijing, China, **2011**.
5. Zhu, H.-n.; Yuan, X.-z.; Zeng, G.-m.; Jiang, M.; Liang, J.; Zhang, C.; Yin, J.; Huang, H.-j.; Liu, Z.-f.; Jiang, H.-w. Ecological risk assessment of heavy metals in sediments of Xiawan Port based on modified potential ecological risk index. *Transactions of Nonferrous Metals Society of China* **2012**, *22*, 1470–1477. [https://doi.org/10.1016/S1003-6326\(11\)61343-5](https://doi.org/10.1016/S1003-6326(11)61343-5).
6. Zhou, Y.; Ning, X.-a.; Liao, X.; Lin, M.; Liu, J.; Wang, J. Characterization and environmental risk assessment of heavy metals found in fly ashes from waste filter bags obtained from a Chinese steel plant. *Ecotoxicology and Environmental Safety* **2013**, *95*, 130–136. <https://doi.org/10.1016/j.ecoenv.2013.05.026>.
7. Hakanson, L. An ecological risk index for aquatic pollution control. A sedimentological approach. *Water Research* **1980**, *14*, 975–1001. [https://doi.org/10.1016/0043-1354\(80\)90143-8](https://doi.org/10.1016/0043-1354(80)90143-8).
8. Dahl, O.; Nurmesniemi, H.; Pöykiö, R.; Watkins, G. Heavy metal concentrations in bottom ash and fly ash fractions from a large-sized (246MW) fluidized bed boiler with respect to their Finnish forest fertilizer limit values. *Fuel Processing Technology* **2010**, *91*, 1634–1639. <https://doi.org/10.1016/j.fuproc.2010.06.012>.
9. ECD. Council decision of 19 December 2002 establishing criteria and procedures for the acceptance of waste at landfills pursuant to Article 16 of and Annex II to Directive 1999/31/EC. *Official Journal of the European communities* **2002**, *16*, 27–49.
